# Supplementary material for: The miR-146b-3p/TNFAIP2 axis regulates cell differentiation in acute myeloid leukaemia
Source: publisher site journal article supplement (doi:10.18632/aging.205441), 2024-01-24
Supplement: Supplementary file [file aging-v16i2-205441-supplementary-material-SD1.pdf]

## SUPPLEMENTARY FIGURES

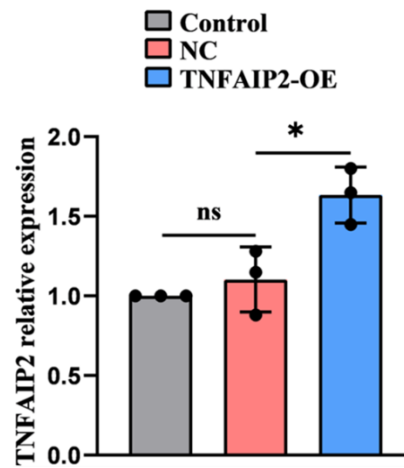

**Supplementary Figure 1.** MOLM-13 cells were transfected with TNFAIP2 overexpression lentivirus (TNFAIP2-OE). The expression of TNFAIP2 mRNA was significantly increased in TNFAIP2-OE group vs. NC control group. \*  $P < 0.05$ .

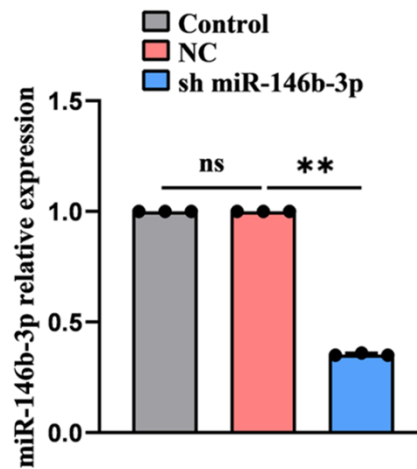

**Supplementary Figure 2.** MOLM-13 cells were transfected with miR-146b-3p interference lentivirus (sh miR-146b-3p). The expression of miR-146b-3p was significantly decreased in sh miR-146b-3p group vs. NC control group. \*\*  $P < 0.01$ .
