# Supplementary material for: The miR-146b-3p/TNFAIP2 axis regulates cell differentiation in acute myeloid leukaemia
Source: publisher site journal article supplement (doi:10.18632/aging.205441), 2024-01-24
Supplement: Supplementary file [file aging-v16i2-205441-supplementary-material-SD2.pdf]

## SUPPLEMENTARY TABLES

**Supplementary Table 1. Representative gene primers used to perform qRT-PCR.**

| Gene            | Primer sequences                                                      |
|-----------------|-----------------------------------------------------------------------|
| TNFAIP2         | Forward: CATATAGGGAGGAGGAAGAG<br>Reverse: AAGACGCAGAACACATTG          |
| $\beta$ -actin  | Forward: CATGTACGTTGCTATCCAGGC<br>Reverse: CTCCTTAATGTCACGCACGAT      |
| hsa-miR-146b-3p | Forward: CGGCCCTGTGGACTCAGT<br>Reverse: AGTGCAGGGTCCGAGGTATT          |
|                 | Stem-loop Primer: GTCGTATCCAGTGCAGGGTCCGAGGTATTTCGCACTGGATACGACACCAGA |
| hsa-U6          | Forward: AGAGAAGATTAGCATGGCCCCTG<br>Reverse: CAGTGCAGGGTCCGAGGT       |
|                 | Stem-loop Primer: GTCGTATCCAGTGCAGGGTCCGAGGTATTTCGCACTGGATACGACAAAATA |

**Supplementary Table 2. Patients' clinical characteristics.**

| Characteristics  | n   | %     |
|------------------|-----|-------|
| Gender           |     |       |
| Female           | 69  | 46.0% |
| Male             | 81  | 54.0% |
| Age              |     |       |
| $\leq 60$        | 87  | 58.0% |
| $> 60$           | 63  | 42.0% |
| Cytogenetics     |     |       |
| Normal           | 76  | 50.6% |
| Monosomal        | 51  | 34.0% |
| Complex          | 23  | 15.4% |
| Cytogenetic risk |     |       |
| Favorable        | 28  | 18.7% |
| Intermediate     | 89  | 59.3% |
| Poor             | 33  | 22.0% |
| FLT3 mutation    |     |       |
| Negative         | 102 | 68.0% |
| Positive         | 48  | 32.0% |
| NPM1 mutation    |     |       |
| Negative         | 112 | 74.7% |
| Positive         | 38  | 25.3% |
| OS event         |     |       |
| Alive            | 52  | 34.7% |
| Dead             | 98  | 65.3% |
